# Supplementary material
Source: HighWire-hosted journal article supplement (https://bmjopen.bmj.com/content/14/3/e080657)
Supplement: inline-supplementary-material-6 [file inline-supplementary-material-6.pdf]

## Supplementary File 5

**Newcastle-Ottawa Scale (NOS) quality assessment summary for the study “A scoping review of assessment tools for, magnitudes of, and factors associated with problem drinking in population-based studies,” 2023.**

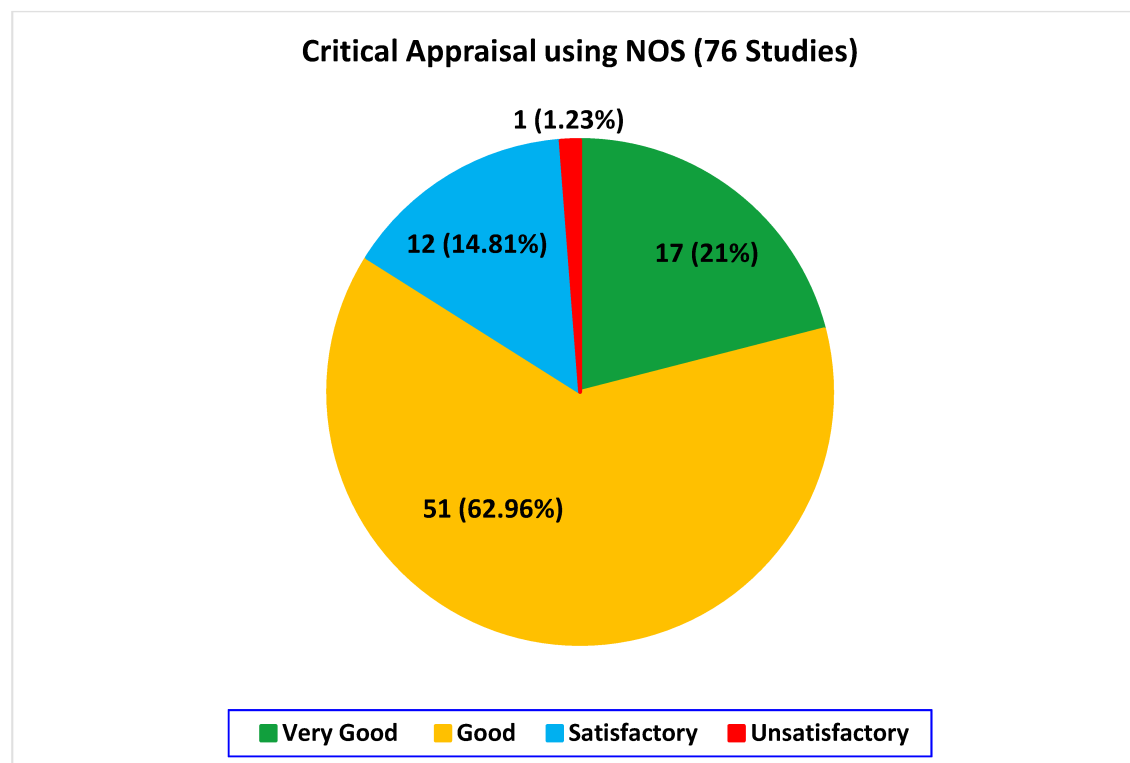

**Figure: Newcastle-Ottawa Scale (NOS) quality assessment reports of studies for the study “A scoping review of assessment tools for, magnitudes of, and factors associated with problem drinking in population-based studies,” 2023.**

| <b>Table: Newcastle-Ottawa Scale (NOS) quality assessment- item level summary for “A scoping review of assessment tools for, magnitudes of, and factors associated with problem drinking in population-based studies,” 2023.</b> |  | <b>Studies (81)</b> |
|----------------------------------------------------------------------------------------------------------------------------------------------------------------------------------------------------------------------------------|--|---------------------|
| <b>Selection: (Maximum 5 points/scores/stars)</b>                                                                                                                                                                                |  |                     |
| <b>1. Representativeness of the sample:</b>                                                                                                                                                                                      |  |                     |
| a. Truly representative of the average in the target population. * (all subjects/consecutive or random sampling)                                                                                                                 |  | <b>69</b>           |
| b. Somewhat representative of the average in the target group. * (non-random sampling)                                                                                                                                           |  | <b>12</b>           |
| c. Selected group of users/convenience sample.                                                                                                                                                                                   |  | <b>0</b>            |
| d. No description of the derivation of the included subjects (sampling strategy).                                                                                                                                                |  | <b>0</b>            |
| <b>2. Sample size:</b>                                                                                                                                                                                                           |  |                     |
| a. Justified and satisfactory (including sample size calculation). * (1 score)                                                                                                                                                   |  | <b>44</b>           |
| b. Not justified                                                                                                                                                                                                                 |  | <b>23</b>           |
| c. No information provided                                                                                                                                                                                                       |  | <b>14</b>           |
| <b>3. Non-respondents:</b>                                                                                                                                                                                                       |  |                     |
| a. Proportion of target sample recruited attains pre-specified target or basic summary of non-respondent characteristics in sampling frame recorded. *                                                                           |  | <b>72</b>           |
| b. Unsatisfactory recruitment rate, no summary data on non-respondents.                                                                                                                                                          |  | <b>02</b>           |
| c. No information provided                                                                                                                                                                                                       |  | <b>07</b>           |
| <b>4. Ascertainment of the exposure (risk factor/disease) or screening/surveillance (measurement) tool:</b>                                                                                                                      |  |                     |
| a. Secure record (medical charts) or validated measurement (screening/surveillance) tool. **                                                                                                                                     |  | <b>28</b>           |
| b. Non-validated measurement tool, but the tool is available or described or Self report. *                                                                                                                                      |  | <b>52</b>           |
| c. No description of the measurement tool.                                                                                                                                                                                       |  | <b>01</b>           |
| <b>Comparability: (Maximum 2 stars)</b>                                                                                                                                                                                          |  |                     |

|                                                                                                                                                                                     |           |
|-------------------------------------------------------------------------------------------------------------------------------------------------------------------------------------|-----------|
| <b>1. Comparability of subjects in different outcome groups on the basis of design or analysis. Confounding factors controlled.</b>                                                 |           |
| a. Data/results adjusted for relevant predictors/risk factors/confounders e.g., age, sex, marital status, job etc. **                                                               | <b>68</b> |
| b. Data/results not adjusted for all relevant confounders/risk factors/information not provided.                                                                                    | <b>13</b> |
| <b>Outcome: (Maximum 3 stars)</b>                                                                                                                                                   |           |
| <b>1. Assessment of outcome:</b>                                                                                                                                                    |           |
| a. Independent blind (structured) assessment. **                                                                                                                                    | <b>14</b> |
| b. Record linkage. **                                                                                                                                                               | <b>0</b>  |
| c. Self report. *                                                                                                                                                                   | <b>67</b> |
| d. No description.                                                                                                                                                                  | <b>0</b>  |
| <b>2. Statistical test:</b>                                                                                                                                                         |           |
| a. Statistical test used to analyse the data clearly described, appropriate and measures of association presented including confidence intervals and probability level (p value). * | <b>74</b> |
| b. Statistical test not appropriate, not described, or incomplete.                                                                                                                  | <b>07</b> |
